# Supplementary material for: Grazing Effects on Seedling Emergence in Contrasting Wet and Dry Year in a Semiarid Grassland
Source: MDPI journal article supplement (doi:10.3390/agronomy12092131), 2022-09-08
Supplement: s1 [file s1]

**Table S1.** Species composition under the different grazing intensities during the two experimental years

|    | Species                        | Family         | Life form | 2019 |    |    | 2020 |    |    |
|----|--------------------------------|----------------|-----------|------|----|----|------|----|----|
|    |                                |                |           | LG   | MG | HG | LG   | MG | HG |
| 1  | <i>Corispermum macrocarpum</i> | Chenopodiaceae | A-F       | +    | +  | +  | +    | +  | +  |
| 2  | <i>Setaria viridis</i>         | Gramineae      | A-G       | +    | +  | +  | +    | +  | +  |
| 3  | <i>Salsola collina</i>         | Chenopodiaceae | A-F       | +    | +  | +  | +    | +  | +  |
| 4  | <i>Bassia dasyphylla</i>       | Chenopodiaceae | A-F       | +    | +  | +  | +    | +  | +  |
| 5  | <i>Chenopodium glaucum</i>     | Chenopodiaceae | A-F       | +    | +  | +  | +    | +  | +  |
| 6  | <i>Euphobia humifusa</i>       | Vitaceae       | A-F       | +    | +  | +  | +    | +  | +  |
| 7  | <i>Tribulus terrestris</i>     | Zygophyllaceae | A-F       | +    | +  | +  | +    | +  | +  |
| 8  | <i>Ixeris polycephala</i>      | Compositae     | A-F       | +    | +  | -  | +    | +  | +  |
| 9  | <i>Echinops gmelinii</i>       | Compositae     | A-F       | +    | +  | -  | +    | +  | -  |
| 10 | <i>Digitaria ciliaris</i>      | Gramineae      | A-G       | -    | +  | -  | +    | +  | +  |
| 11 | <i>Agriophyllum squarrosum</i> | Chenopodiaceae | A-F       | -    | -  | -  | +    | +  | +  |
| 12 | <i>Eragrostis pilosa</i>       | Gramineae      | A-G       | -    | +  | -  | -    | +  | +  |
| 13 | <i>Artemisia sieversiana</i>   | Compositae     | A-F       | -    | +  | -  | +    | -  | -  |
| 14 | <i>Artemisia scoparia</i>      | Compositae     | A-F       | -    | +  | -  | +    | -  | -  |
| 15 | <i>Tragus mongolorum</i>       | Gramineae      | A-G       | -    | +  | -  | -    | +  | -  |
| 16 | <i>Aristida adscensionis</i>   | Gramineae      | A-G       | -    | +  | -  | -    | -  | -  |

Note: A-F: annual forb; A-G: annual grass. + means that the species present in the habitats; - means that the species does not appear in the habitats.
